# Supplementary material for: TSG-6 Regulates Bone Remodeling through Inhibition of Osteoblastogenesis and Osteoclast Activation
Source: PubMed Central journal article supplement — J Biol Chem. 2008 Sep 19;283(38):25952–62. doi: 10.1074/jbc.M802138200 (PMC2533787; doi:10.1074/jbc.m802138200), 2008-09-19

## SUPPLEMENTARY

**SUPPLEMENTARY FIGURE 1. Western blot analysis of recombinant mouse and human TSG-6 with anti-TSG-6 antibody.** Murine recombinant TSG-6 (R&D Systems) and recombinant human TSG-6 (rhTSG-6; (1)) were run on 10% (w/v) Tris-Tricine SDS-PAGE at 500 ng/lane and electroblotted onto Hybond-P membranes (Amersham Biosciences) as described in (1). Western blot analysis was carried out as described previously (1), but using a rabbit anti-TSG-6 polyclonal antibody raised against the peptide ASVTAGGFQIK (see Experimental Procedures), which is completely conserved in the human and mouse TSG-6 proteins, at a concentration of 1 µg/ml. The different molecular weights of the mouse and human TSG-6 recombinant proteins apparent in this analysis are due to the different sizes of *N*-linked glycans present on the mouse myeloma cell and *Drosophila* S2 cell (1) expressed material, respectively (M.S. Rugg and A. J. Day, unpublished data), and the presence of a 6-amino acid histidine tag at the C-terminal end of the murine protein (as described in the data sheet provided by the manufacturer).

### Reference

1. Nentwich, H. A., Mustafa, Z., Rugg, M. S., Marsden, B. D., Cordell, M. R., Mahoney, D. J., Jenkins S. C., Dowling, B., Fries, E., Milner, C. M., Loughlin, J. and Day, A. J. (2002) *J Biol Chem* **277**, 15354-15362

Supplementary Figure 1

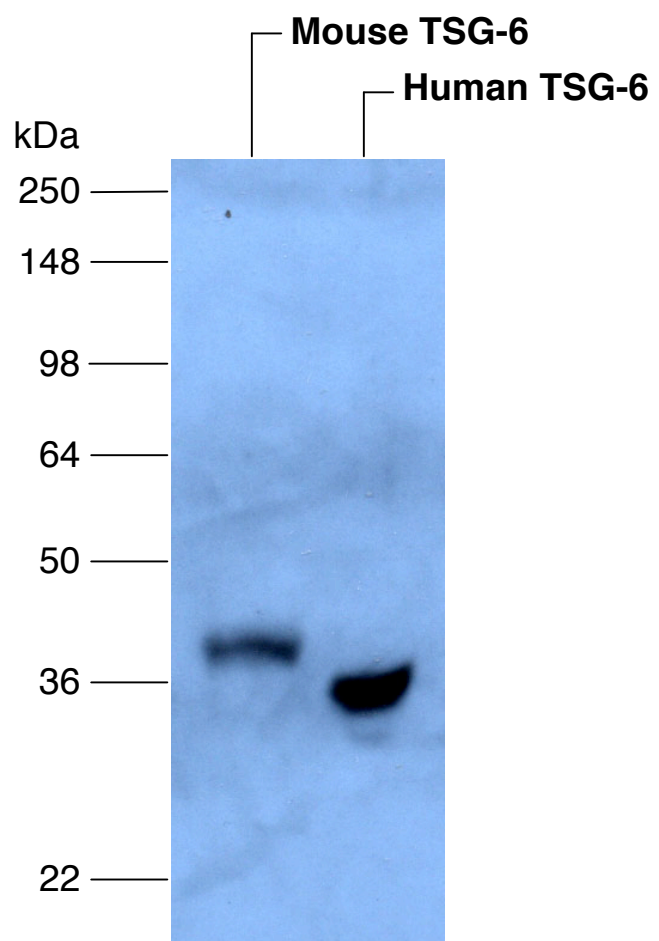

Supplement: supp_M802138200_Suppdata.pdf [file supp_M802138200_Suppdata.pdf]
